# Supplementary figures and images for: Decreased synthesis of ribosomal proteins in tauopathy revealed by non‐canonical amino acid labelling
Source: PubMed Central journal article supplement — EMBO J. 2019 May 22;38(13):e101174. doi: 10.15252/embj.2018101174 (PMC6600635; doi:10.15252/embj.2018101174), 2019-05-22

# Figure 4 source data

## Figure 4 A

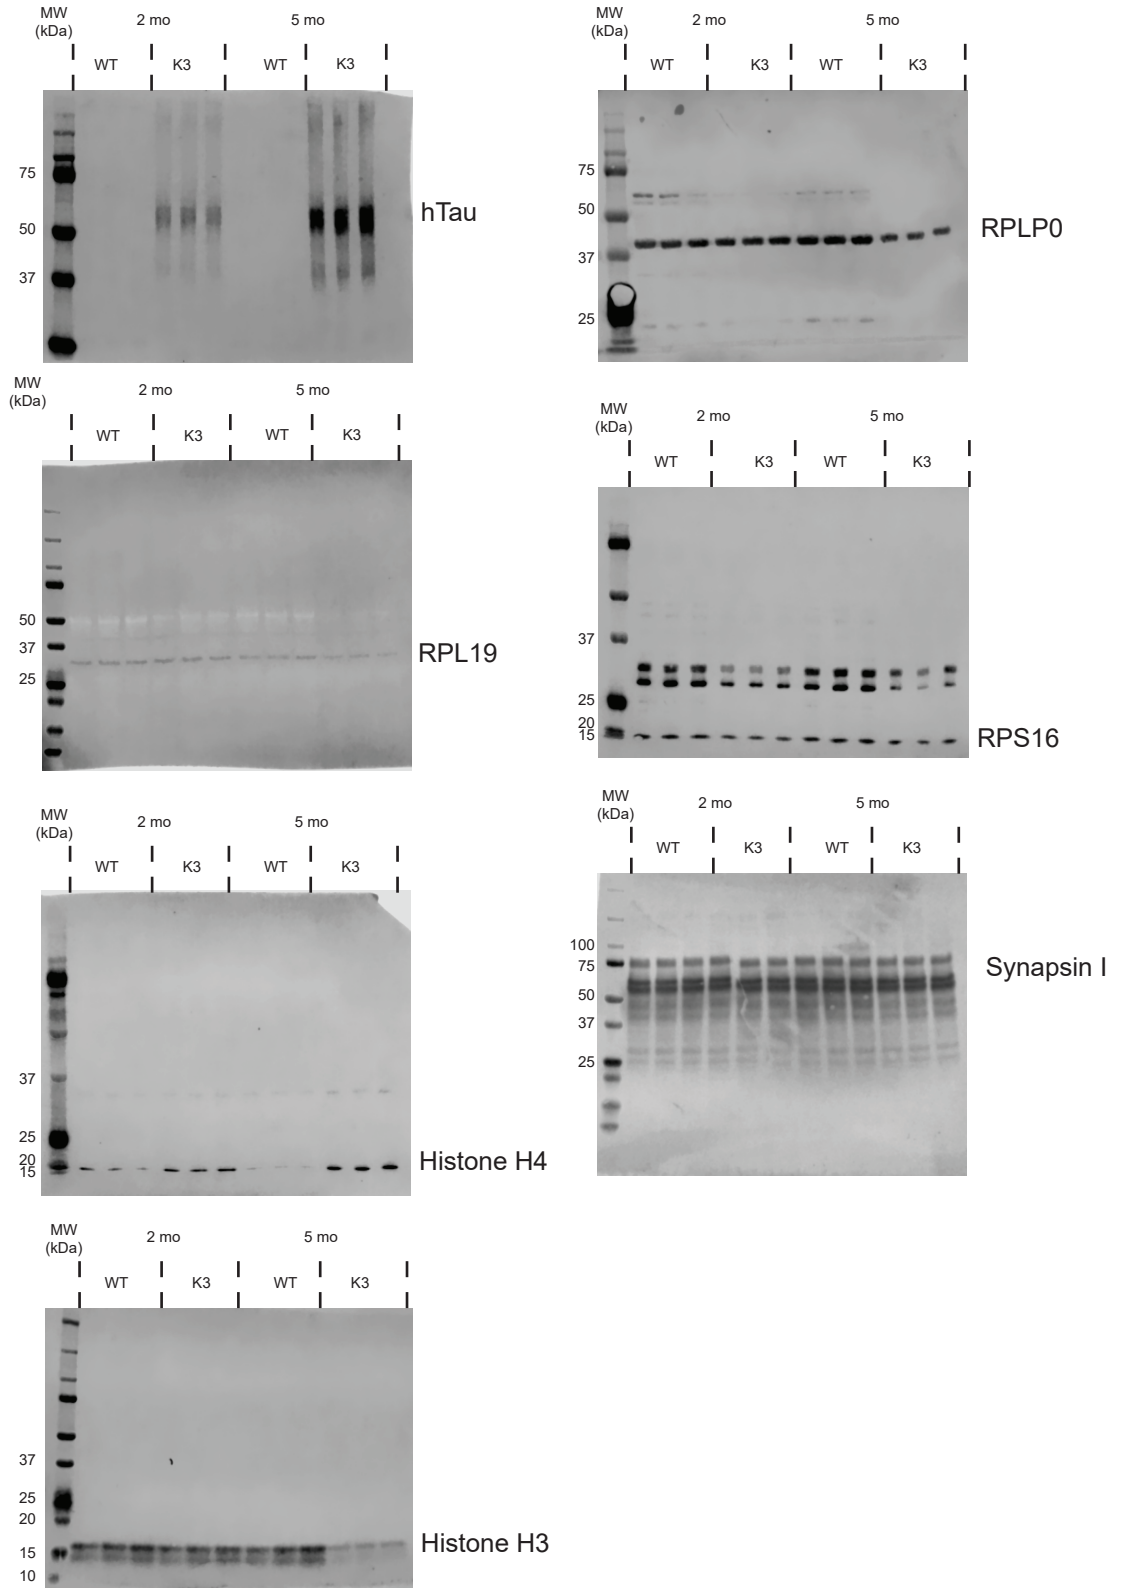

Supplement: EMBJ-38-e101174-s005.pdf [file EMBJ-38-e101174-s005.pdf]
